# Supplementary material for: Food-specific IgGs Are Highly Increased in the Sera of Patients with Inflammatory Bowel Disease and Are Clinically Relevant to the Pathogenesis
Source: PubMed Central journal article supplement — Intern Med. 2018 May 18;57(19):2787–98. doi: 10.2169/internalmedicine.9377-17 (PMC6207831; doi:10.2169/internalmedicine.9377-17), 2018-05-18
Supplement: 1349-7235-57-2787-s001.pdf [file 1349-7235-57-2787-s001.pdf]

**Table S1** Classification of IBD patients and healthy controls

| Observed value | Predictive value |    |          |                          |
|----------------|------------------|----|----------|--------------------------|
|                | CD               | UC | Controls | Percentage of correction |
| CD             | 150              | 6  | 45       | 74.6%                    |
| UC             | 13               | 11 | 76       | 11.0%                    |
| Controls       | 18               | 3  | 157      | 88.2%                    |
