# Supplementary material for: Food-specific IgGs Are Highly Increased in the Sera of Patients with Inflammatory Bowel Disease and Are Clinically Relevant to the Pathogenesis
Source: PubMed Central journal article supplement — Intern Med. 2018 May 18;57(19):2787–98. doi: 10.2169/internalmedicine.9377-17 (PMC6207831; doi:10.2169/internalmedicine.9377-17), 2018-05-18
Supplement: 1349-7235-57-2787-s002.pdf [file 1349-7235-57-2787-s002.pdf]

**Table S2** Correlation between positive food-specific IgG distribution and age, sex, disease location and disease behavior

| Variables                             | Food-specific IgGs (+) | Food-specific IgGs (-) |           |
|---------------------------------------|------------------------|------------------------|-----------|
| <b>Age</b>                            |                        |                        |           |
| A1 ( $\leq 16$ years)                 | 14                     | 0                      |           |
| A2 (17-40 years)                      | 111                    | 11                     |           |
| A3 ( $>40$ years)                     | 53                     | 12                     | (P<0.05)  |
| <b>Sex</b>                            |                        |                        |           |
| Male                                  | 116                    | 14                     |           |
| Female                                | 62                     | 9                      | (P=0.685) |
| <b>Disease location</b>               |                        |                        |           |
| L1 (Terminal ileum)                   | 39                     | 5                      |           |
| L2 (Colon)                            | 42                     | 7                      |           |
| L3 (Ileocolon)                        | 94                     | 10                     |           |
| L4 (Upper gastrointenstina)           | 6                      | 2                      | (P=0.605) |
| <b>Disease behavior</b>               |                        |                        |           |
| B1 (Non-Stricturing, non-penetrating) | 80                     | 11                     |           |
| B2 (Stricturing)                      | 73                     | 10                     |           |
| B3 (Penetrating)                      | 25                     | 2                      | (P=0.758) |
