# Supplementary material for: Food-specific IgGs Are Highly Increased in the Sera of Patients with Inflammatory Bowel Disease and Are Clinically Relevant to the Pathogenesis
Source: PubMed Central journal article supplement — Intern Med. 2018 May 18;57(19):2787–98. doi: 10.2169/internalmedicine.9377-17 (PMC6207831; doi:10.2169/internalmedicine.9377-17), 2018-05-18
Supplement: 1349-7235-57-2787-s003.pdf [file 1349-7235-57-2787-s003.pdf]

**Table S3** Levels of food specific-IgGs against 14 food antigens before and after IFX treatment

|          | Before IFX (n=31) |                        | After IFX (n=31) |                        | P-value |
|----------|-------------------|------------------------|------------------|------------------------|---------|
|          | Mean              | Standard error of mean | Mean             | Standard error of mean |         |
| Beef     | 0.34              | 0.94                   | 0.13             | 0.51                   | 0.29    |
| Chicken  | 4.83              | 9.22                   | 2.14             | 8                      | 0.23    |
| Codfish  | 26.44             | 78.04                  | 14.89            | 32.74                  | 0.47    |
| Corn     | 90.22             | 90.96                  | 62.23            | 73.08                  | 0.19    |
| Crab     | 13.18             | 23.43                  | 8.66             | 17.31                  | 0.39    |
| Egg      | 173.92*           | 120.06                 | 90.03*           | 95.43                  | 0.00    |
| Mushroom | 15.62             | 26.09                  | 10               | 16.41                  | 0.31    |
| Milk     | 111.97            | 161.26                 | 62.41            | 91.16                  | 0.14    |
| Pork     | 8.54              | 22.59                  | 0.95             | 2.88                   | 0.07    |
| Rice     | 81.46             | 93.97                  | 71.39            | 114.25                 | 0.71    |
| Shrimp   | 14.1              | 37.44                  | 4.65             | 14.04                  | 0.18    |
| Soybean  | 80.6              | 107.55                 | 38.52            | 62.54                  | 0.07    |
| Tomato   | 99.9              | 117.17                 | 56.18            | 85.14                  | 0.1     |
| Wheat    | 59.21             | 99.03                  | 41.05            | 66.16                  | 0.4     |

\*p< 0.05, as compared with that before IFX treatment.
