# Supplementary material for: Food-specific IgGs Are Highly Increased in the Sera of Patients with Inflammatory Bowel Disease and Are Clinically Relevant to the Pathogenesis
Source: PubMed Central journal article supplement — Intern Med. 2018 May 18;57(19):2787–98. doi: 10.2169/internalmedicine.9377-17 (PMC6207831; doi:10.2169/internalmedicine.9377-17), 2018-05-18
Supplement: 1349-7235-57-2787-s004.pdf [file 1349-7235-57-2787-s004.pdf]

Figure S1

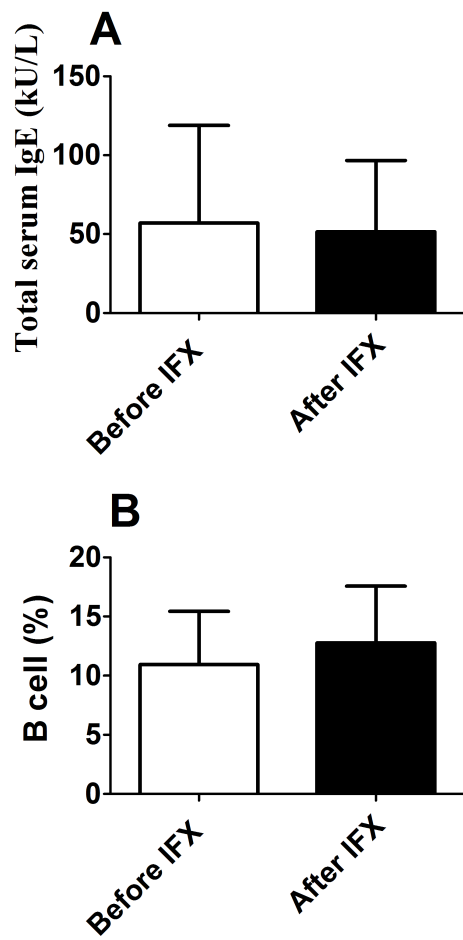

**Figure S1** The levels of IgE and percentage of B cell before and after IFX treatment.

\* $p < 0.05$  as compared with that before IFX treatment.
